# Supplementary material for: Strand-specific single-cell methylomics reveals distinct modes of DNA demethylation dynamics during early mammalian development
Source: PubMed Central journal article supplement (PMC7904860; doi:10.1038/s41467-021-21532-6), 2021-02-24
Supplement: 41467_2021_21532_MOESM3_ESM.pdf [file 41467_2021_21532_MOESM3_ESM.pdf]

## **Description of Additional Supplementary Files**

**Supplementary Software:** The zipped file “process\_scmspji.zip” contains a script, a readme text file with all information to run the script, and a list of barcodes.
